# Supplementary material
Source: PubMed Central journal article supplement (PMC2765465)

## SUPPLEMENTARY INFORMATION

### MUTATION IN *SHOC2* PROMOTES ABERRANT PROTEIN *N*-MYRISTOYLATION AND UNDERLIES NOONAN-LIKE SYNDROME WITH LOOSE ANAGEN HAIR

Viviana Cordeddu<sup>1</sup>, Elia Di Schiavi<sup>2</sup>, Len A. Pennacchio<sup>3,4</sup>, Avi Ma'ayan<sup>5</sup>, Anna Sarkozy<sup>6,§</sup>, Valentina Fodale<sup>1,7</sup>, Serena Cecchetti<sup>8</sup>, Alessio Cardinale<sup>9</sup>, Joel Martin<sup>4</sup>, Wendy Schackwitz<sup>4</sup>, Anna Lipzen<sup>4</sup>, Giuseppe Zampino<sup>10</sup>, Laura Mazzanti<sup>11</sup>, Maria C. Digilio<sup>12</sup>, Simone Martinelli<sup>1</sup>, Elisabetta Flex<sup>1</sup>, Francesca Lepri<sup>6</sup>, Deborah Bartholdi<sup>13</sup>, Kerstin Kutsche<sup>14</sup>, Giovanni B. Ferrero<sup>15</sup>, Cecilia Anichini<sup>16</sup>, Angelo Selicorni<sup>17</sup>, Cesare Rossi<sup>18</sup>, Romano Tenconi<sup>19</sup>, Martin Zenker<sup>20</sup>, Daniela Merlo<sup>8,9</sup>, Bruno Dallapiccola<sup>6,7</sup>, Ravi Iyengar<sup>5</sup>, Paolo Bazzicalupo<sup>2</sup>, Bruce D. Gelb<sup>21,22</sup> and Marco Tartaglia<sup>1,22</sup>

<sup>1</sup>Dipartimento di Ematologia, Oncologia e Medicina Molecolare, Istituto Superiore di Sanità, 00161 Rome, Italy. <sup>2</sup>Istituto di Genetica e Biofisica “A. Buzzati Traverso”, Consiglio Nazionale delle Ricerche, 80131 Naples, Italy. <sup>3</sup>Genomics Division, Lawrence Berkeley National Laboratory, Berkeley, CA 94720. <sup>4</sup>US Department of Energy Joint Genome Institute, Walnut Creek, CA 94598. <sup>5</sup>Department of Pharmacology and Systems Therapeutics, Systems Biology Center New York (SBCNY), Mount Sinai School of Medicine, New York, NY 10029. <sup>6</sup>IRCCS-Casa Sollievo della Sofferenza, San Giovanni Rotondo and Istituto Mendel, 00198, Rome, Italy. <sup>7</sup>Department of Experimental Medicine, University “La Sapienza”, 00198, Rome, Italy. <sup>8</sup>Dipartimento di Biologia Cellulare e Neuroscienze, Istituto Superiore di Sanità, 00161 Rome, Italy. <sup>9</sup>IRCCS-San Raffaele Pisana, 00163, Rome, Italy. <sup>10</sup>Istituto di Clinica Pediatrica, Università Cattolica del Sacro Cuore, 00168, Rome, Italy. <sup>11</sup>Dipartimento di Pediatria, Università degli Studi di Bologna, 40138 Bologna, Italy. <sup>12</sup>Sezione di Genetica Medica, Ospedale Bambino Gesù, 00165, Rome, Italy. <sup>13</sup>Institute of Medical Genetics, University of Zurich, 8603 Schwerzenbach, Switzerland. <sup>14</sup>Institut für Humangenetik, Universitätsklinikum Hamburg-Eppendorf, 20246 Hamburg, Germany. <sup>15</sup>Dipartimento di Pediatria, Università di Torino, 10126 Turin, Italy. <sup>16</sup>Dipartimento di Pediatria, Ostetricia e Medicina della Riproduzione, Università di Siena, Siena, 53100, Italy. <sup>17</sup>I Clinica Pediatrica, IRCCS Fondazione Policlinico Milano, 20122 Milan, Italy. <sup>18</sup>U.O. Genetica Medica, Policlinico S. Orsola-Malpighi, 40138 Bologna, Italy. <sup>19</sup>Dipartimento di Pediatria, Università di Padova, 35128 Padua, Italy. <sup>20</sup>Institute of Human Genetics, University Hospital Erlangen, University of Erlangen-Nuremberg, 91054 Erlangen, Germany. <sup>21</sup>Center for Molecular Cardiology and Departments of Pediatrics and Genetics & Genomic Sciences, Mount Sinai School of Medicine, New York, NY 10029. <sup>22</sup>These two authors contributed equally as the senior investigators for this project.

<sup>§</sup>Current address: Northern Genetic Service, Institute of Human Genetics, Newcastle University, International Centre for Life, Newcastle upon Tyne, UK

## TABLE OF CONTENTS

1. **Supplementary Table 1.** Leading Noonan syndrome disease candidates predicted by mammalian protein-protein interaction network analysis.
2. **Supplementary Table 2.** Clinical features of *SHOC2* mutation-positive patients.
3. **Supplementary Table 3.** Vulval precursor cell induction in *C. elegans* strains expressing the wild-type or mutant SHOC2 protein.
4. **Supplementary Table 4.** Phenotypes in *C. elegans* resulting from expression of the *SHOC2<sup>wt</sup>*, *SHOC2<sup>S2G</sup>* or *myr::*SHOC<sup>wt</sup>* transgene.*
5. **Supplementary Table 5.** Phenotypes observed in *C. elegans let-23<sup>fl</sup>* mutants after expression of the wild-type or mutant *SHOC2* transgene.
6. **Supplementary Figure 1.** *SHOC2* is mutated in Noonan-like syndrome with loose anagen hair.
7. **Supplementary Figure 2.** Myristoylation is required for membrane targeting of the *SHOC2<sup>S2G</sup>* mutant.
8. **Supplementary Figure 3.** Subcellular localization of the V5-tagged *SHOC2<sup>S2A</sup>* proteins expressed in Cos-1 and Neuro2A cells, basally and following EGF stimulation.

**Supplementary Table 1. Leading Noonan syndrome disease candidates predicted by mammalian protein-protein interaction network analysis.**

| Protein name                            | Links for the node | Total links in background | Links to seed | Total links in subnetwork | z-score  |
|-----------------------------------------|--------------------|---------------------------|---------------|---------------------------|----------|
| <i>One node/Two links subnetwork</i>    |                    |                           |               |                           |          |
| SHOC2                                   | 4                  | 11184                     | 2             | 22                        | 22.48034 |
| NRAS                                    | 25                 | 11184                     | 2             | 22                        | 8.80567  |
| CRKL                                    | 34                 | 11184                     | 2             | 22                        | 7.48228  |
| JAK1                                    | 39                 | 11184                     | 2             | 22                        | 6.95066  |
| INSR                                    | 41                 | 11184                     | 2             | 22                        | 6.76514  |
| JAK2                                    | 60                 | 11184                     | 2             | 22                        | 5.48344  |
| BCL2                                    | 68                 | 11184                     | 2             | 22                        | 5.10772  |
| PRKCA                                   | 91                 | 11184                     | 2             | 22                        | 4.30827  |
| EGFR                                    | 106                | 11184                     | 2             | 22                        | 3.92713  |
| <i>Two nodes/Three links subnetwork</i> |                    |                           |               |                           |          |
| SHOC2                                   | 4                  | 11184                     | 2             | 223                       | 6.86825  |
| RASSF2                                  | 2                  | 11184                     | 1             | 223                       | 4.85658  |
| SPRY1                                   | 3                  | 11184                     | 1             | 223                       | 3.88303  |
| FRS2                                    | 11                 | 11184                     | 2             | 223                       | 3.84067  |
| SLAMF6                                  | 4                  | 11184                     | 1             | 223                       | 3.29149  |
| APBB1IP                                 | 4                  | 11184                     | 1             | 223                       | 3.29149  |
| GRAP                                    | 5                  | 11184                     | 1             | 223                       | 2.88021  |
| HRAS                                    | 5                  | 11184                     | 1             | 223                       | 2.88021  |
| RIT2                                    | 7                  | 11184                     | 1             | 223                       | 2.32640  |
| NRAS                                    | 25                 | 11184                     | 2             | 223                       | 2.14823  |
| RRAS                                    | 8                  | 11184                     | 1             | 223                       | 2.12572  |

**Supplementary Table 2. Clinical features of *SHOC2* mutation-positive patients.**

| <b>Patient</b>                            | <b>N02</b> | <b>27518</b> | <b>N11</b> | <b>26841</b> | <b>N16</b> | <b>N10</b> | <b>N01</b> | <b>27925</b> |
|-------------------------------------------|------------|--------------|------------|--------------|------------|------------|------------|--------------|
| <b>Sex</b>                                | F          | M            | M          | F            | F          | M          | M          | M            |
| <b>Age (years)</b>                        | 0.1        | 1.6          | 2.7        | 5.8          | 6.0        | 7.2        | 7.5        | 7.9          |
| <b>Short stature (&lt;3rd centile)</b>    | na         | +            | +          | +            | +          | +          | +          | +            |
| <b>GH deficiency</b>                      | nd         | nd           | nd         | +            | nd         | +          | +          | nd           |
| <b>Craniofacial anomalies</b>             |            |              |            |              |            |            |            |              |
| - <i>Macrocephaly</i>                     | -          | +            | +          | +            | +          | +          | +          | +            |
| - <i>Prominent forehead</i>               | +          | +            | +          | +            | +          | -          | +          | +            |
| - <i>Bitemporal narrowing</i>             | -          | -            | +          | -            | +          | -          | -          | -            |
| - <i>Hypertelorism</i>                    | +          | +            | +          | +            | +          | +          | +          | +            |
| - <i>Palpebral ptosis</i>                 | +          | +            | +          | +            | +          | +          | +          | +            |
| - <i>Low-set/posteriorly rotated ears</i> | +          | +            | +          | +            | +          | +          | +          | +            |
| <b>Congenital heart defect</b>            |            |              |            |              |            |            |            |              |
| - <i>Pulmonic stenosis</i>                | -          | +            | +          | -            | +          | -          | -          | +            |
| - <i>Hypertrophic cardiomyopathy</i>      | -          | +            | -          | -            | +          | -          | -          | -            |
| - <i>Mitral/tricuspid dysplasia</i>       | +          | nd           | -          | -            | -          | +          | -          | -            |
| - <i>Atrial/ventricular septal defect</i> | -          | ASD          | -          | -            | ASD        | VSD        | -          | -            |
| <b>Skin/ectodermal anomalies</b>          |            |              |            |              |            |            |            |              |
| - <i>Dark skin</i>                        | na         | -            | -          | -            | +          | +          | +          | -            |
| - <i>Hyperkeratosis</i>                   | -          | -            | -          | -            | KP         | -          | -          | -            |
| - <i>Sparse/absent scalp hair</i>         | +          | +            | +          | +            | +          | +          | +          | +            |
| - <i>Loose anagen hair</i>                | nd         | nd           | nd         | +            | nd         | nd         | +          | +            |
| - <i>Eczema</i>                           | -          | +            | +          | -            | +          | -          | -          | -            |
| <b>Skeletal abnormalities</b>             |            |              |            |              |            |            |            |              |
| - <i>Short/webbed neck</i>                | +          | +            | +          | -            | +          | +          | +          | -            |
| - <i>Pectus anomalies</i>                 | +          | +            | +          | +            | +          | -          | +          | -            |
| <b>Undescended testes</b>                 | na         | -            | -          | na           | na         | -          | -          | -            |
| <b>CNS involvement</b>                    |            |              |            |              |            |            |            |              |
| - <i>Mental retardation</i>               | na         | +            | +          | +            | +          | +          | +          | +            |
| - <i>Hyperactivity</i>                    | na         | nd           | -          | -            | +          | +          | +          | +            |
| <b>Ocular anomalies</b>                   |            |              |            |              |            |            |            |              |
| - <i>Strabismus</i>                       | -          | -            | -          | +            | +          | -          | +          | -            |
| - <i>Refraction errors</i>                | -          | -            | -          | -            | -          | -          | -          | -            |
| <b>Coagulation defects</b>                | -          | -            | +          | -            | nd         | -          | -          | -            |
| <b>Hypernasal/hoarse voice</b>            | -          | -            | -          | -            | +          | -          | -          | +            |

**Supplementary Table 2. Clinical features of *SHOC2* mutation-positive patients. (continued)**

| <b>Patient</b>                            | <b>N08</b>  | <b>10424</b> | <b>N04</b> | <b>34644</b> | <b>N15</b> | <b>N07</b> | <b>N06</b> | <b>N05</b> |
|-------------------------------------------|-------------|--------------|------------|--------------|------------|------------|------------|------------|
| <b>Sex</b>                                | M           | F            | M          | F            | M          | F          | F          | M          |
| <b>Age (years)</b>                        | 8.0         | 8.3          | 8.3        | 9.5          | 9.6        | 10.8       | 11.2       | 12.0       |
| <b>Short stature (&lt;3rd centile)</b>    | +           | +            | +          | +            | +          | +          | +          | +          |
| <b>GH deficiency</b>                      | +           | +            | -          | -            | +          | +          | +          | -          |
| <b>Craniofacial anomalies</b>             |             |              |            |              |            |            |            |            |
| - <i>Macrocephaly</i>                     | +           | +            | +          | +            | +          | -          | +          | +          |
| - <i>Prominent forehead</i>               | +           | +            | +          | +            | +          | +          | +          | -          |
| - <i>Bitemporal narrowing</i>             | -           | -            | -          | -            | -          | -          | -          | -          |
| - <i>Hypertelorism</i>                    | +           | +            | +          | +            | +          | +          | +          | +          |
| - <i>Palpebral ptosis</i>                 | +           | +            | -          | +            | +          | -          | +          | -          |
| - <i>Low-set/posteriorly rotated ears</i> | +           | +            | +          | -            | +          | +          | +          | -          |
| <b>Congenital heart defect</b>            |             |              |            |              |            |            |            |            |
| - <i>Pulmonic stenosis</i>                | +           | -            | -          | +            | -          | -          | -          | +          |
| - <i>Hypertrophic cardiomyopathy</i>      | -           | -            | -          | -            | +          | -          | -          | -          |
| - <i>Mitral/tricuspid dysplasia</i>       | -           | -            | -          | -            | -          | +          | -          | -          |
| - <i>Atrial/ventricular septal defect</i> | -           | -            | -          | ASD          | -          | ASD        | ASD        | ASD        |
| <b>Skin/ectodermal anomalies</b>          |             |              |            |              |            |            |            |            |
| - <i>Dark skin</i>                        | +           | +            | +          | +            | +          | +          | +          | +          |
| - <i>Hyperkeratosis</i>                   | -           | -            | ICH        | -            | -          | -          | ICH        | -          |
| - <i>Sparse/absent scalp hair</i>         | +           | +            | +          | +            | +          | +          | +          | +          |
| - <i>Loose anagen hair</i>                | +           | nd           | +          | nd           | +          | nd         | +          | +          |
| - <i>Eczema</i>                           | +           | -            | -          | -            | +          | +          | -          | -          |
| <b>Skeletal abnormalities</b>             |             |              |            |              |            |            |            |            |
| - <i>Short/webbed neck</i>                | -           | -            | +          | +            | +          | -          | +          | +          |
| - <i>Pectus anomalies</i>                 | +           | +            | -          | +            | +          | +          | +          | +          |
| <b>Undescended testes</b>                 | -           | na           | -          | na           | +          | na         | na         | -          |
| <b>CNS involvement</b>                    |             |              |            |              |            |            |            |            |
| - <i>Mental retardation</i>               | -           | +            | +          | +            | +          | +          | +          | -          |
| - <i>Hyperactivity</i>                    | -           | -            | +          | -            | +          | +          | +          | +          |
| <b>Ocular anomalies</b>                   |             |              |            |              |            |            |            |            |
| - <i>Strabismus</i>                       | -           | +            | -          | +            | +          | -          | +          | -          |
| - <i>Refraction errors</i>                | HYP,<br>AST | -            | -          | HYP          | -          | -          | -          | MYO        |
| <b>Coagulation defects</b>                | nd          | -            | -          | +            | -          | +          | -          | +          |
| <b>Hypernasal/hoarse voice</b>            | +           | -            | +          | -            | -          | -          | +          | -          |

**Supplementary Table 2. Clinical features of *SHOC2* mutation-positive patients. (continued)**

| <b>Patient</b>                            | <b>32696</b> | <b>N03</b> | <b>N14</b> | <b>20179</b> | <b>22407</b> | <b>N13</b>  | <b>N17</b> | <b>33526</b> | <b>N09</b> |
|-------------------------------------------|--------------|------------|------------|--------------|--------------|-------------|------------|--------------|------------|
| <b>Sex</b>                                | M            | M          | F          | M            | M            | M           | M          | M            | M          |
| <b>Age (years)</b>                        | 12.9         | 13.0       | 13.1       | 13.1         | 14.2         | 17.2        | 22.6       | 36.5         | 39.7       |
| <b>Short stature (&lt;3rd centile)</b>    | +            | +          | +          | +            | +            | +           | +          | +            | +          |
| <b>GH deficiency</b>                      | nd           | nd         | +          | nd           | +            | +           | +          | nd           | nd         |
| <b>Craniofacial anomalies</b>             |              |            |            |              |              |             |            |              |            |
| - <i>Macrocephaly</i>                     | +            | +          | +          | +            | +            | +           | +          | +            | +          |
| - <i>Prominent forehead</i>               | +            | +          | +          | +            | +            | +           | +          | +            | +          |
| - <i>Bitemporal narrowing</i>             | -            | -          | -          | -            | -            | -           | -          | -            | -          |
| - <i>Hypertelorism</i>                    | +            | +          | -          | +            | +            | +           | +          | -            | +          |
| - <i>Palpebral ptosis</i>                 | +            | +          | +          | +            | +            | +           | +          | +            | +          |
| - <i>Low-set/posteriorly rotated ears</i> | +            | +          | -          | +            | +            | +           | +          | +            | +          |
| <b>Congenital heart defect</b>            |              |            |            |              |              |             |            |              |            |
| - <i>Pulmonic stenosis</i>                | +            | -          | -          | -            | -            | -           | +          | -            | -          |
| - <i>Hypertrophic cardiomyopathy</i>      | -            | +          | -          | +            | -            | -           | -          | -            | -          |
| - <i>Mitral/tricuspid dysplasia</i>       | +            | +          | -          | +            | -            | +           | -          | +            | -          |
| - <i>Atrial/ventricular septal defect</i> | VSD          | -          | -          | -            | ASD          | -           | -          | -            | ASD        |
| <b>Skin/ectodermal anomalies</b>          |              |            |            |              |              |             |            |              |            |
| - <i>Dark skin</i>                        | -            | -          | +          | -            | +            | +           | +          | -            | +          |
| - <i>Hyperkeratosis</i>                   | -            | KP         | -          | KP           | -            | KP          | KP         | -            | KP         |
| - <i>Sparse/absent scalp hair</i>         | +            | +          | +          | +            | +            | +           | +          | +            | +          |
| - <i>Loose anagen hair</i>                | nd           | +          | +          | nd           | nd           | +           | +          | nd           | nd         |
| - <i>Eczema</i>                           | -            | +          | +          | -            | -            | -           | -          | -            | -          |
| <b>Skeletal abnormalities</b>             |              |            |            |              |              |             |            |              |            |
| - <i>Short/webbed neck</i>                | +            | +          | +          | +            | -            | -           | +          | +            | -          |
| - <i>Pectus anomalies</i>                 | +            | +          | +          | +            | -            | +           | -          | +            | +          |
| <b>Undescended testes</b>                 | +            | +          | na         | +            | -            | -           | +          | +            | -          |
| <b>CNS involvement</b>                    |              |            |            |              |              |             |            |              |            |
| - <i>Mental retardation</i>               | -            | +          | +          | +            | +            | -           | +          | +            | +          |
| - <i>Hyperactivity</i>                    | -            | -          | +          | nd           | nd           | +           | +          | -            | +          |
| <b>Ocular anomalies</b>                   |              |            |            |              |              |             |            |              |            |
| - <i>Strabismus</i>                       | -            | +          | +          | -            | +            | +           | +          | +            | -          |
| - <i>Refraction errors</i>                | HYP          | -          | MYO        | -            | HYP          | MYO,<br>AST | AST        | -            | -          |
| <b>Coagulation defects</b>                | -            | +          | -          | -            | -            | -           | -          | +            | -          |
| <b>Hypernasal/hoarse voice</b>            | -            | +          | -          | -            | -            | -           | -          | -            | -          |

F: female; M: male; na: not applicable; nd: no data.

Cardiac anomalies: ASD, atrial septal defects; VSD, ventricular septal defects.

Skin/ectodermal anomalies: ICH, Ichthyosis; KP, keratosis pilaris.

Ocular anomalies: AST, astigmatism; HYP, hypermetropia; MYO, myopia.

**Supplementary Table 3. Vulval precursor cell induction in *C. elegans* strains expressing the wild-type or mutant SHOC2 protein.**

| Genotype                                       | Transgene                  | N    | Muv <sup>a</sup>  | N  | Induction of vulval fate VPC |                   |      |      |      |      | Average          |
|------------------------------------------------|----------------------------|------|-------------------|----|------------------------------|-------------------|------|------|------|------|------------------|
|                                                |                            |      |                   |    | P3.p                         | P4.p              | P5.p | P6.p | P7.p | P8.p |                  |
| <i>let-60<sup>gof</sup></i>                    | none                       | 135  | 68.1              | 39 | 30.8                         | 41.0              | 100  | 100  | 100  | 30.8 | 4.0              |
| <i>let-60<sup>gof</sup>;sur-8<sup>rf</sup></i> | none                       | 302  | 7.9               | 85 | 2.4                          | 5.9               | 100  | 100  | 100  | 14.1 | 3.2              |
| <i>let-60<sup>gof</sup>;sur-8<sup>rf</sup></i> | <i>SHOC2<sup>wt</sup></i>  | 271  | 19.6 <sup>b</sup> | 45 | 4.4                          | 35.6 <sup>c</sup> | 100  | 100  | 100  | 37.8 | 3.8 <sup>b</sup> |
| <i>let-60<sup>gof</sup>;sur-8<sup>rf</sup></i> | <i>SHOC2<sup>S2G</sup></i> | 104  | 10.6              | 29 | 3.4                          | 3.4               | 100  | 100  | 100  | 3.4  | 3.1 <sup>d</sup> |
| wild type                                      | none                       | >100 | 0                 |    |                              |                   |      |      |      |      |                  |
| <i>let-60<sup>gof</sup></i>                    | none                       | 135  | 68.1              |    |                              |                   |      |      |      |      |                  |
| <i>let-60<sup>gof</sup></i>                    | <i>SHOC2<sup>wt</sup></i>  | 72   | 61.1              |    |                              |                   |      |      |      |      |                  |
| <i>let-60<sup>gof</sup></i>                    | <i>SHOC2<sup>S2G</sup></i> | 132  | 65.9              |    |                              |                   |      |      |      |      |                  |

Strains: *let-60<sup>gof</sup>* indicates *let-60(n1046)*, *sur-8<sup>rf</sup>* indicates *sur-8(ku167)*.

*SHOC2<sup>wt</sup>* indicates *hsp16.2::SHOC2<sup>wt</sup>::V5*, *SHOC2<sup>S2G</sup>* indicates *hsp16.2::SHOC2<sup>S2G</sup>::V5*.

N indicates the number of animals scored, VPC indicates vulval precursor cell.

Animals were heat-shocked at early L3 stage. Induction of vulval fate is expressed as the percent of individual VPCs (P3.p to P8.p) dividing more than one time. Average refers to the average number of VPCs induced per animal.

P values were calculated using t-Student test for average VPC induction and z statistics for all other proportions.

<sup>a</sup>Muv is expressed as the percent of animals with ectopic pseudovulvae.

<sup>b</sup>Significantly different from the *let-60<sup>gof</sup>;sur-8<sup>rf</sup>* strain ( $P < 0.001$ ).

<sup>c</sup>Significantly different from the *let-60<sup>gof</sup>;sur-8<sup>rf</sup>* strain ( $P < 0.005$ ).

<sup>d</sup>Significantly different from the *let-60<sup>gof</sup>;sur-8<sup>rf</sup>* strain expressing the *SHOC2<sup>wt</sup>* transgene ( $P < 0.001$ ).

**Supplementary Table 4. Phenotypes in *C. elegans* resulting from expression of the *SHOC2<sup>wt</sup>*, *SHOC2<sup>S2G</sup>* or *myr::*SHOC2<sup>wt</sup>* transgene.***

| Genotype  | Transgene                             | <i>N</i> | Pvl               | <i>N</i> | Egl               | <i>N</i> | Bag               |
|-----------|---------------------------------------|----------|-------------------|----------|-------------------|----------|-------------------|
| Wild type | none                                  | 56       | 1.8               | 25       | 19.2              | 20       | 5.0               |
| Wild type | <i>SHOC2<sup>wt</sup></i>             | 44       | 0                 | 25       | 16.2              | 20       | 5.0               |
| Wild type | <i>SHOC2<sup>S2G</sup></i>            | 96       | 17.7 <sup>a</sup> | 25       | 26.3 <sup>a</sup> | 20       | 55.0 <sup>d</sup> |
| Wild type | <i>myr::<i>SHOC2<sup>wt</sup></i></i> | 49       | 36.7 <sup>b</sup> | 25       | 25.5 <sup>c</sup> | 20       | 45.0 <sup>e</sup> |

Animals were heat-shocked at early L3 stage. *SHOC2<sup>wt</sup>* indicates *hsp16.2::*SHOC2<sup>wt</sup>::V5*, *SHOC2<sup>S2G</sup>* indicates *hsp16.2::*SHOC2<sup>S2G</sup>::V5*, *myr::*SHOC2<sup>wt</sup>* indicates *hsp16.2::*myr::*SHOC2<sup>wt</sup>::V5*.*****

*N* indicates the number of animals scored. Pvl is the percent of animals with a protruding vulva. Egl is the average number of eggs per worm contained in the uterus. Bag is the percent of bag-of-worms animals 6 days post fertilization.

<sup>a-e</sup>Significantly different from *SHOC2<sup>wt</sup>* (<sup>a</sup>*P* <0.01; <sup>b</sup>*P* <0.0001; <sup>c</sup>*P* <0.05; <sup>d</sup>*P* <0.005; <sup>e</sup>*P* <0.02).



**Supplementary Table 5. Phenotypes observed in *C. elegans let-23<sup>rf</sup>* mutants after expression of the wild-type or mutant *SHOC2* transgene.**

| Genotype                   | Transgene                  | <i>N</i> | Bag               |
|----------------------------|----------------------------|----------|-------------------|
| wild type                  | none                       | 24       | 0                 |
| <i>let-23<sup>rf</sup></i> | none                       | 93       | 84.9              |
| <i>let-23<sup>rf</sup></i> | <i>SHOC2<sup>wt</sup></i>  | 92       | 85.9              |
| <i>let-23<sup>rf</sup></i> | <i>SHOC2<sup>S2G</sup></i> | 93       | 95.7 <sup>a</sup> |

*let-23<sup>rf</sup>* indicates *let-23(sy1)*, *SHOC2<sup>wt</sup>* indicates *hsp16.2::SHOC2<sup>wt</sup>::V5*, *SHOC2<sup>S2G</sup>* indicates *hsp16.2::SHOC2<sup>S2G</sup>::V5*.

Worms were heat-shocked at early L3 stage.

*N* indicates the number of animals scored. Bag is the percent of animals that become a “bag-of-worm” 4 days post-fertilization.

<sup>a</sup>Significantly different from the *let-23<sup>rf</sup>* strain and the *let-23<sup>rf</sup>* strain expressing *SHOC2<sup>wt</sup>* (*P* <0.05 in both comparisons).

**Supplementary Figure 1. *SHOC2* is mutated in Noonan-like syndrome with loose anagen hair.**

(a) Mammalian protein-protein interaction network analysis identified *SHOC2* as the best disease gene candidate for Noonan syndrome. The network was constructed by connecting proteins known to be mutated in Noonan syndrome (cyan) through two nodes/three links using the human interactome. *SHOC2* is shown in magenta. Connections indicate protein-protein interactions. Leading candidates and Z scores are reported in Supplementary Table 1. (b) Germline origin of the disease-causing 4A>G missense change in *SHOC2*. DHPLC profiles showing the *de novo* origin of the 4A>G nucleotide change in two affected subjects, and electropherograms documenting the heterozygous condition for this mutation at codon 2 in peripheral leukocytes, skin fibroblasts, buccal epithelial cells and/or hair bulb cells from these individuals.

**a**

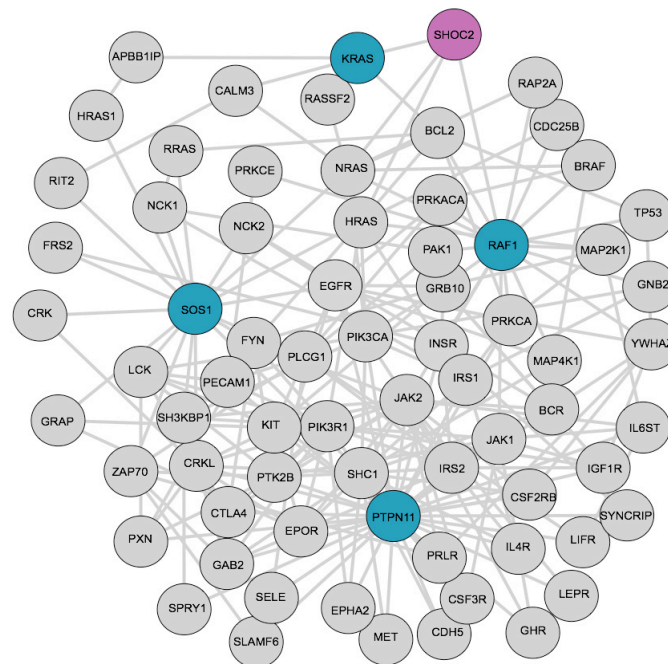

**b**

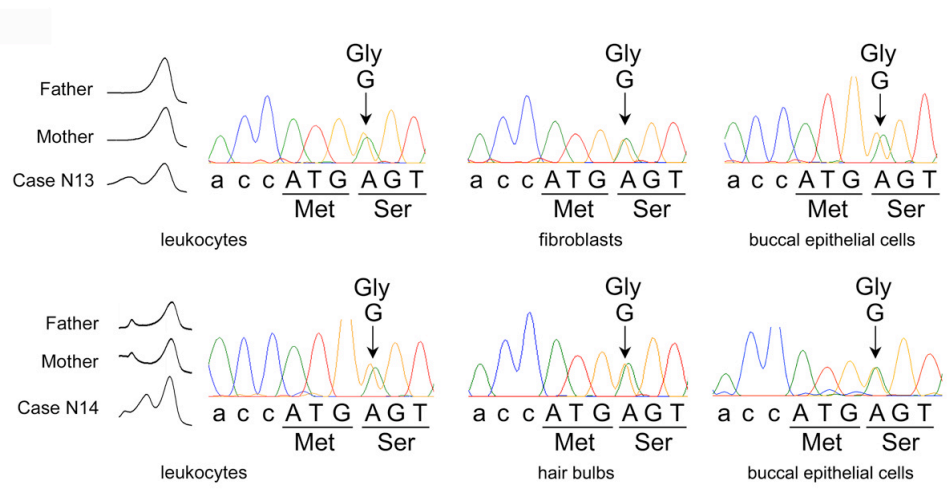

**Supplementary Figure 2. Myristoylation is required for membrane targeting of the SHOC2<sup>S2G</sup> mutant.** V5-tagged SHOC2<sup>S2G</sup> is membrane-targeted in untreated Cos-1 cells (top), while membrane targeting is progressively lost in cells treated with an NMT inhibitor (200  $\mu$ M, middle; 300  $\mu$ M, bottom). Confocal laser scanning microscopy was performed using anti-V5 monoclonal antibody, followed by Alexa Fluor-594 goat anti-mouse antibody (red), while actin cytoskeleton was detected by Alexa Fluor 488-phalloidin (green). Nuclei are visualized by DAPI staining (blue). Co-localization areas were detected in yellow. Images represent single optical sections representative of > 50 transfected cells observed in each experiment. Bars indicate 20  $\mu$ m.

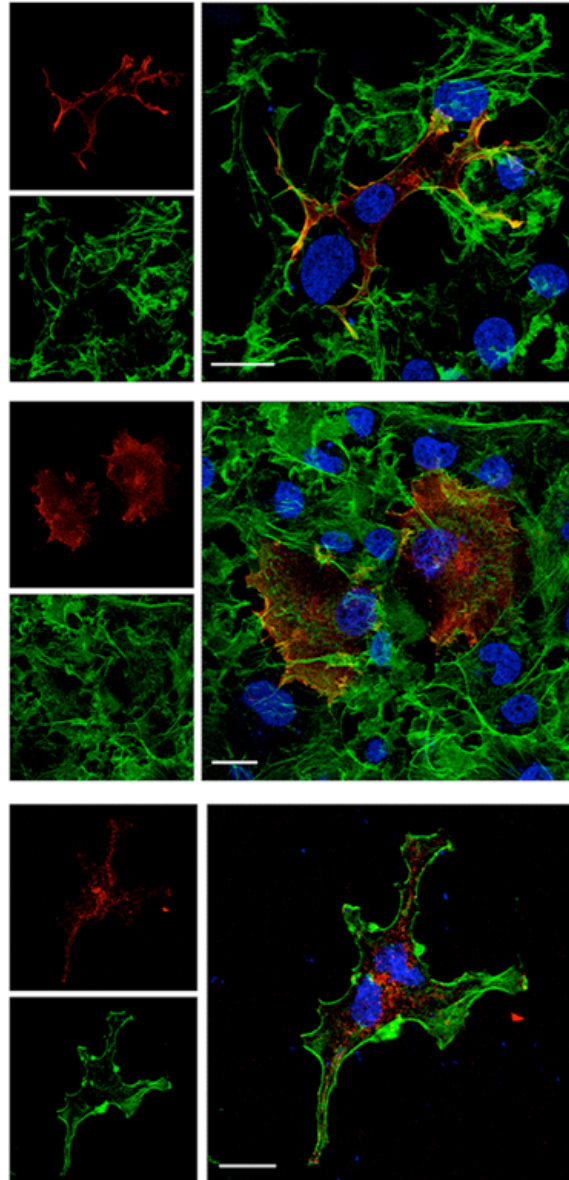

**Supplementary Figure 3. Subcellular localization of the V5-tagged SHOC2<sup>S2A</sup> proteins expressed in Cos-1 and Neuro2A cells, basally and following EGF stimulation.** SHOC2<sup>wt</sup> and SHOC2<sup>S2A</sup> are uniformly spread in the cytoplasm and nucleus in starved cells (upper left and lower left, respectively; panel a: Cos-1 cells, panel b: Neuro2A cells), and are restricted to the nucleus following stimulation (upper right and lower right, respectively; panel a: Cos-1 cells, panel b: Neuro2A cells). Confocal laser scanning microscopy was performed using anti-V5 monoclonal antibody, followed by Alexa Fluor-594 goat anti-mouse antibody (red), while actin cytoskeleton was detected by Alexa Fluor 488-phalloidin (green). Nuclei are visualized by DAPI staining (blue). Images represent single optical sections representative of > 50 transfected cells observed in each experiment. Bars indicate 20  $\mu$ m (Cos-1 cells) or 10  $\mu$ m (Neuro2A cells).

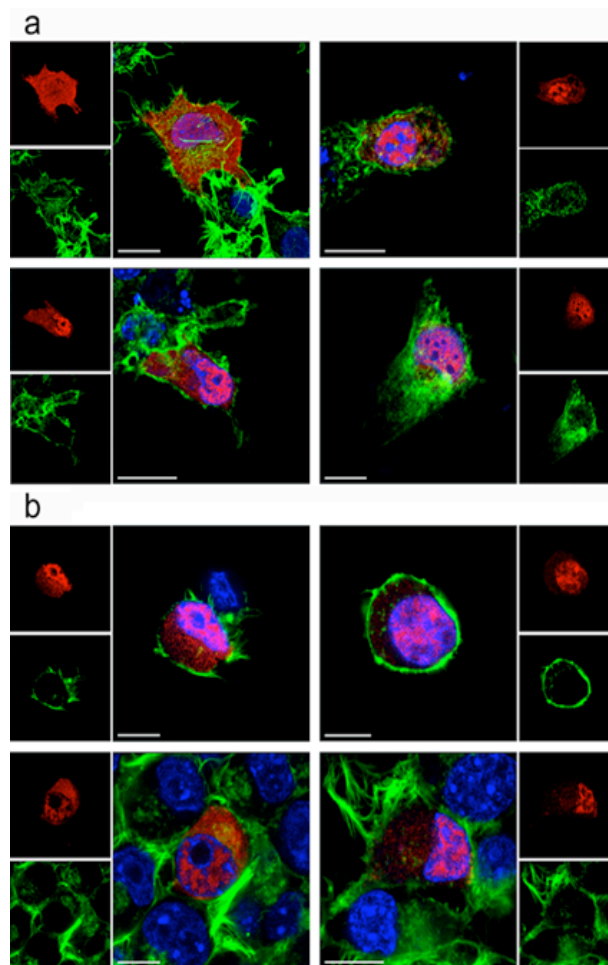

Supplement: NIHMS131154-supplement-1.pdf [file NIHMS131154-supplement-1.pdf]
